# Supplementary material
Source: PubMed Central journal article supplement (PMC5354582)
Supplement: mic-02-376-s01.pdf [file mic-02-376-s01.pdf]

Supplemental Materials for Research Article in *Microbial Cell*:

**Formyl-methionine as a degradation signal  
at the N-termini of bacterial proteins**

Konstantin I. Piatkov<sup>1,3#</sup>, Tri T. M. Vu<sup>1,#</sup>, Cheol-Sang Hwang<sup>2</sup>, and Alexander Varshavsky<sup>1,\*</sup>

<sup>#</sup>These authors contributed equally to this study.

<sup>1</sup>Division of Biology, California Institute of Technology, Pasadena, CA 91125, USA

<sup>2</sup>Department of Life Sciences, Pohang University of Science and Technology, Pohang,  
Gyeongbuk, 790-784, South Korea

<sup>3</sup>Center for Biotechnology and Biomedicine, Skolkovo Institute of Science and Technology,  
Moscow, 143026, Russia

*\*Corresponding author:* Alexander Varshavsky, Division of Biology and Biological  
Engineering, California Institute of Technology, Pasadena, CA 91125, USA.  
Telephone: 626-395-3785. Email: [avarsh@caltech.edu](mailto:avarsh@caltech.edu)

**These Supplemental Materials contain:**

Figure S1 and its legend.

Tables S1 and S2.

Supplemental References.

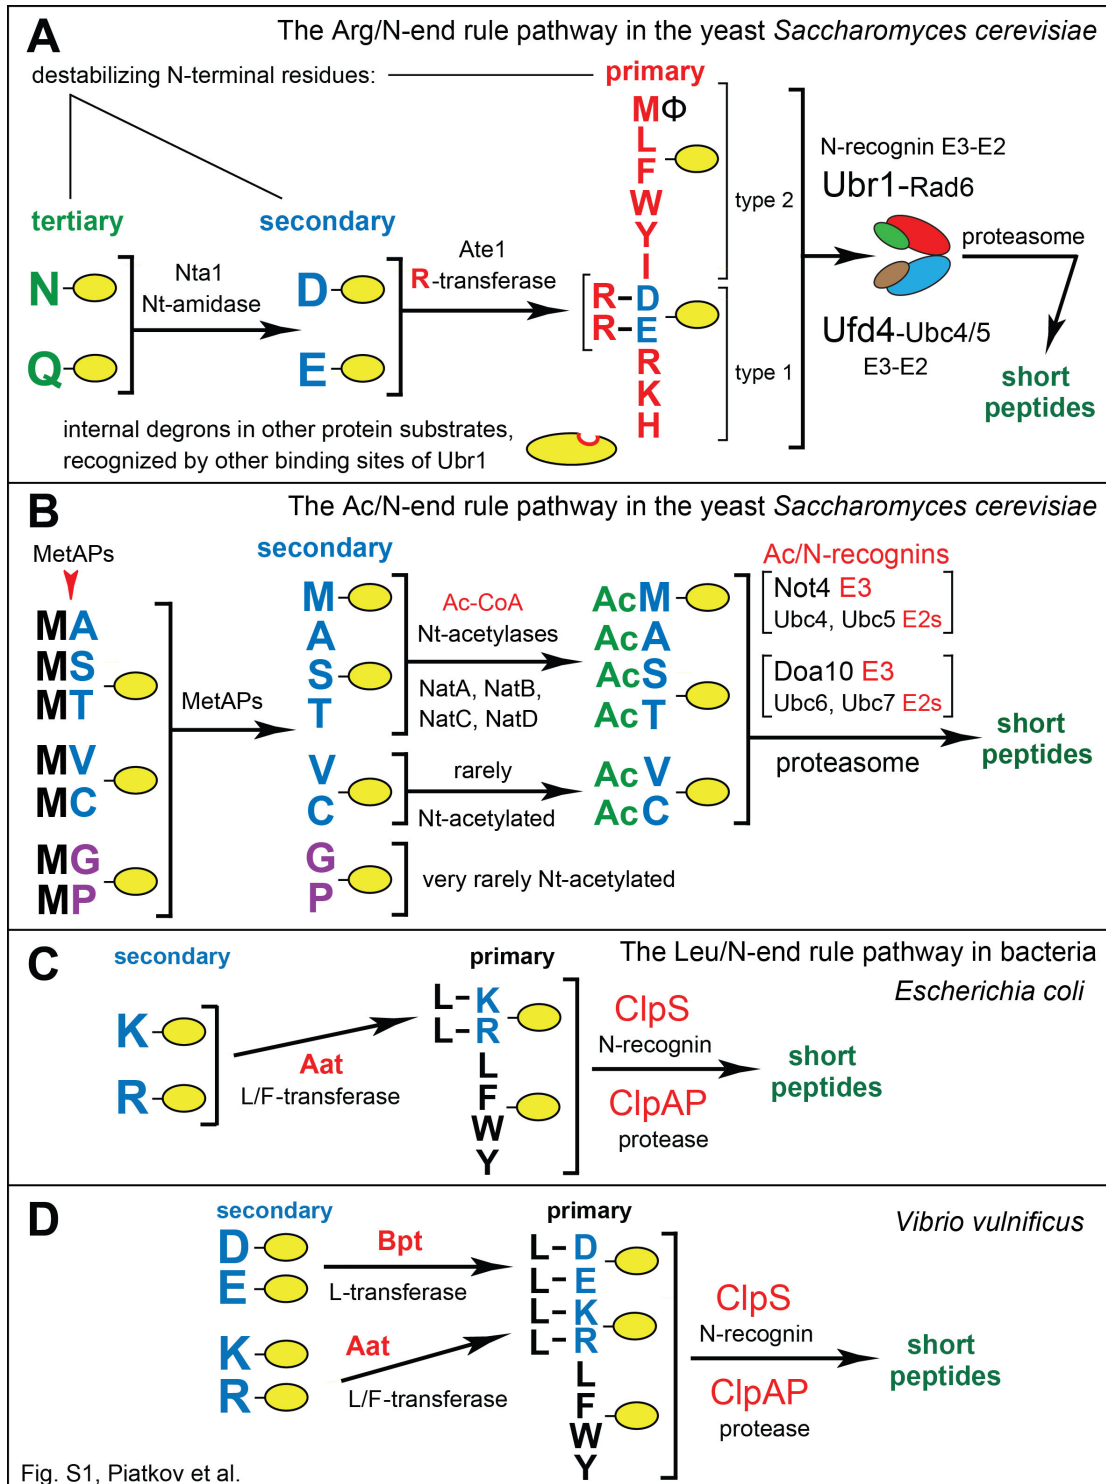

**Figure S1.** The Arg/N-End Rule Pathway and the Ac/N-End Rule Pathway. N-terminal residues are indicated by single-letter abbreviations. A yellow oval denotes the rest of a protein substrate.

The N-end rule pathway recognizes proteins containing N-terminal degradation signals called N-degrons, polyubiquitylates these proteins and thereby causes their degradation by the 26S proteasome. Recognition components of the N-end rule pathway are called N-recognins. Eukaryotic N-recognins are E3 ubiquitin (Ub) ligases that can target N-degrons. The main determinant of an N-degron is a destabilizing N-terminal residue of a protein. In eukaryotes, the N-end rule pathway consists of two branches, described in panels **A** and **B**.

**(A)** The Arg/N-end rule pathway in *S. cerevisiae* [1-5]. The prefix “Arg” in the pathway’s name refers to Nt-arginylation of N-end rule substrates. The Arg/N-end rule pathway targets specific unacetylated N-terminal residues. It is mediated by the Ubr1 N-recognin, a 225 kDa RING-type E3 Ub ligase and a part of the targeting complex containing the Ubr1-Rad6 and Ufd4-Ubc4/5 holoenzymes. The Ubr1 (N-recognin) component of this complex recognizes (binds to) the “primary” destabilizing N-terminal residues Arg, Lys, His, Leu, Phe, Tyr, Trp and Ile, as well as the unmodified N-terminal Met residue, if Met is followed by a bulky hydrophobic ( $\Phi$ ) residue [5]. The terms “secondary” and “tertiary” refer to the indicated enzymatic modifications of specific N-terminal residues. N-terminal Cys can be arginylated by the Ate1 arginyltransferase (R-transferase) only after the oxidation of Cys to Cys-sulfinate or Cys-sulfonate, in reactions that involve nitric oxide (NO) and oxygen [2-4, 6, 7]. Regulated oxidation of N-terminal Cys takes place in multicellular eukaryotes but not in fungi such as *S. cerevisiae*, which apparently do not produce NO under normal conditions.

**(B)** The Ac/N-end rule pathway in *S. cerevisiae* [3, 5, 8-10]. This pathway recognizes substrates through their N<sup>α</sup>-terminally acetylated (Nt-acetylated) residues. The corresponding degradation signals and E3 Ub ligases are called Ac/N-degrons and Ac/N-recognins, respectively. Red arrow on the left indicates the removal of N-terminal Met by Met-aminopeptidases (MetAPs). N-terminal Met is retained if a residue at position 2 is larger than Val [11-13]. The term “secondary” refers to the requirement for a modification (Nt-acetylation) of a destabilizing N-terminal residue before a protein can be recognized by an Ac/N-recognin.

**(C)** and **(D)** The bacterial Leu/N-end rule pathway, in *Escherichia coli* (**C**) and in *Vibrio vulnificus* (**D**) [14-32]. The Aat L/F-transferase conjugates (largely) Leu to N-terminal Arg or Lys. N-end rule substrates bearing primary (bulky hydrophobic) destabilizing N-terminal residues are recognized by the ClpS N-recognin and are delivered for degradation to the ClpAP protease. In *V. vulnificus*, the Leu/N-end rule pathway contains both the Aat L/F-transferase and the Bpt L-transferase. As a result, N-terminal Asp and Glu, which are not destabilizing residues in *E. coli*, function as secondary destabilizing residues in *V. vulnificus* [16].

Regulated degradation of proteins or their natural fragments by the N-end rule pathway mediates a broad range of biological functions (refs. [2-5, 8-10, 31] and refs therein).

**Table S1.** Bacterial strains used in this study.

| <i>E. coli</i> strains | Genotype                                                                                                                                        | Source or Ref.     |
|------------------------|-------------------------------------------------------------------------------------------------------------------------------------------------|--------------------|
| MG1655                 | <i>F- λ- rph-1</i>                                                                                                                              | [33]               |
| MG-D                   | <i>F- λ- rph-1 Δ(def-fmt)::cm ΔgloB::frt</i>                                                                                                    | Gift from D. Mazel |
| DH5α                   | <i>φ80 lacZΔM15 endA1 recA1 gyrA96 thi-1 hsdR17 (r<sub>k</sub><sup>-</sup>, m<sub>k</sub><sup>-</sup>) relA1 supE44 deoR Δ(lacZYA-argF)U169</i> | Promega            |
| CAG12184               | <i>λ rph-1 tolC210::Tn10 (tet)</i>                                                                                                              | [34]               |
| KPS73                  | <i>λ- rph-1 tolC210::Tn10 (tet) Δfmt ::Km</i>                                                                                                   | This study         |
| KPS74                  | <i>λ- rph-1 tolC210::Tn10 (tet) Δdef-Δfmt ::Km</i>                                                                                              | This study         |

**Table S2.** Plasmids used in this study.

| Plasmid name | Description                                                                                                                                                                                                                                                                                                                                                     | Source or Ref.         |
|--------------|-----------------------------------------------------------------------------------------------------------------------------------------------------------------------------------------------------------------------------------------------------------------------------------------------------------------------------------------------------------------|------------------------|
| pJT184       | Cm <sup>R</sup> ; pACYC184-based plasmid with 2.8-kb BamHI/SalI insert containing <i>S. cerevisiae</i> Ubp1.                                                                                                                                                                                                                                                    | [14]                   |
| pBADET       | Ap <sup>R</sup> ; pBAD2-based plasmid containing arabinose-inducible promoter and expanded multiple cloning site.                                                                                                                                                                                                                                               | Gift from V. Ksenzenko |
| pACYC177     | Ap <sup>R</sup> , Km <sup>R</sup> ; low copy vector containing p15A repl. origin.                                                                                                                                                                                                                                                                               | [35, 36]               |
| pKD46        | Ap <sup>R</sup> ; ts replication (repA101ts); encodes lambda Red genes ( <i>exo</i> , <i>bet</i> , <i>gam</i> ); native terminator (tL3) after <i>exo</i> gene; arabinose-inducible promoter for expression ( <i>Para</i> ); encodes <i>araC</i> for repression of the <i>Para</i> promoter. This plasmid was used for chromosomal deletions of specific genes. | [37]                   |
| pKD3         | Ap <sup>R</sup> , Cm <sup>R</sup> ; R6K origin-based plasmid containing <i>cat</i> -cassette flanked by FRT sites. This plasmid was used as a template in PCR to create gene-specific <i>cat</i> -cassettes.                                                                                                                                                    | [37]                   |
| pCH178       | Ap <sup>R</sup> ; p314CUP1-based plasmid expressing Ub-CK-e <sup>K</sup> -ha-Ura3.                                                                                                                                                                                                                                                                              | [9]                    |
| pKP249       | Ap <sup>R</sup> ; pBADET-based plasmid expressing P1 <sup>T2</sup> -e <sup>K</sup> -ha-Ura3 from <i>Para</i> promoter.                                                                                                                                                                                                                                          | This study             |
| pKP250       | Ap <sup>R</sup> ; pBADET-based plasmid expressing P1 <sup>T2D</sup> -e <sup>K</sup> -ha-Ura3 from <i>Para</i> promoter.                                                                                                                                                                                                                                         | This study             |
| pKP251       | Ap <sup>R</sup> ; pBADET-based plasmid expressing Ub-P1 <sup>T2</sup> -e <sup>K</sup> -ha-Ura3 from <i>Para</i> promoter.                                                                                                                                                                                                                                       | This study             |
| pKP252       | Ap <sup>R</sup> ; pBADET-based plasmid expressing Ub-P1 <sup>T2D</sup> -e <sup>K</sup> -ha-Ura3 from <i>Para</i> promoter.                                                                                                                                                                                                                                      | This study             |
| pKP257       | Ap <sup>R</sup> ; pACYC177-based plasmid expressing P1 <sup>T2</sup> -e <sup>K</sup> -ha-Ura3 from P <sub>KmR</sub> promoter.                                                                                                                                                                                                                                   | This study             |
| pKP258       | Ap <sup>R</sup> ; pACYC177-based plasmid                                                                                                                                                                                                                                                                                                                        | This study             |

|        |                                                                                                                                                                                  |            |
|--------|----------------------------------------------------------------------------------------------------------------------------------------------------------------------------------|------------|
|        | expressing P1 <sup>T2D</sup> -e <sup>K</sup> -ha-Ura3 from P <sub>KmR</sub> promoter.                                                                                            |            |
| pKP286 | Ap <sup>R</sup> ; pBADET-based plasmid expressing PpiB-8his-flag from <i>Para</i> promoter.                                                                                      | This study |
| pKP287 | Ap <sup>R</sup> ; pBADET-based plasmid expressing PpiB <sup>V2D</sup> -8his-flag from <i>Para</i> promoter.                                                                      | This study |
| pKP335 | Ap <sup>R</sup> ; pBADET-based plasmid expressing PpiB-8his-flag-Ub-PpiB-8his-flag from <i>Para</i> promoter                                                                     | This study |
| pKP458 | Ap <sup>R</sup> ; pBADET-based plasmid expressing <sup>MVTV</sup> PpiB-8his-flag and <sup>MDDD</sup> PpiB-8his-flag-Ub from two identical and independent <i>Para</i> promoters. | This study |
| pKP459 | Ap <sup>R</sup> ; pBADET-based plasmid expressing <sup>MVTV</sup> PpiB-8his-flag and <sup>MYFY</sup> PpiB-8his-flag-Ub from two identical and independent <i>Para</i> promoters. | This study |

## Supplemental References

1. Hwang CS, Shemorry A, Varshavsky A (2010). The N-end rule pathway is mediated by a complex of the RING-type Ubr1 and HECT-type Ufd4 ubiquitin ligases. **Nat. Cell Biol.** 12: 1177-1185. doi: 10.1038/ncb2121.
2. Tasaki TS, Sriram SM, Park KS, Kwon YT (2012). The N-end rule pathway. **Annu. Rev. Biochem.** 81: 261-289. doi: 10.1146/annurev-biochem-051710-093308.
3. Varshavsky A (2011). The N-end rule pathway and regulation by proteolysis. **Prot. Sci.** 20: 1298-1345. doi: 10.1002/pro.666.
4. Gibbs DJ, Bacardit J, Bachmair A, Holdsworth MJ (2014). The eukaryotic N-end rule pathway: conserved mechanisms and diverse functions. **Trends Cell Biol.** 24: 603-611. doi: 10.1016/j.tcb.2014.05.001.
5. Kim HK, Kim RR, Oh JH, Cho H, Varshavsky A, Hwang CS (2014). The N-terminal methionine of cellular proteins as a degradation signal. **Cell** 156: 158-169. doi: 10.1016/j.cell.2013.11.031.
6. Hu R-G, Sheng J, Xin Q, Xu Z, Takahashi TT, Varshavsky A (2005). The N-end rule pathway as a nitric oxide sensor controlling the levels of multiple regulators. **Nature** 437: 981-986. PMID: 16222293.
7. Lee MJ, Tasaki T, Moroi K, An JY, Kimura S, Davydov IV, Kwon YT (2005). RGS4 and RGS5 are in vivo substrates of the N-end rule pathway. **Proc. Natl. Acad. Sci. USA** 102: 15030-15035. PMID: 16217033.
8. Shemorry A, Hwang CS, Varshavsky A (2013). Control of protein quality and stoichiometries by N-terminal acetylation and the N-end rule pathway. **Mol. Cell** 50: 540-551. doi: 10.1016/j.molcel.2013.03.018.
9. Hwang CS, Shemorry A, Varshavsky A (2010). N-terminal acetylation of cellular proteins creates specific degradation signals. **Science** 327: 973-977. doi: 10.1126/science.1183147.
10. Park SE, Kim JM, Seok OH, Cho H, Wadas B, Kim SY, Varshavsky A, Hwang CS (2015). Control of mammalian G protein signaling by N-terminal acetylation and the N-end rule pathway. **Science** 347: 1249-1252. doi: 10.1126/science.aaa3844.
11. Chen S, Vetro JA, Chang Y-H (2002). The specificity in vivo of two distinct methionine aminopeptidases in *Saccharomyces cerevisiae*. **Arch. Biochem. Biophys.** 398: 87-93. PMID: 11811952.
12. Xiao Q, Zhang F, Nacev BA, Liu JO, Pei D (2010). Protein N-terminal processing: substrate specificity of *Escherichia coli* and human methionine aminopeptidases. **Biochemistry** 49: 5588-5599. doi: 10.1021/bi1005464.
13. Frottin F, Martinez A, Peynot P, Mitra S, Holz RC, Giglione C, Meinnel T (2006). The proteomics of N-terminal methionine cleavage. **Mol. Cell. Proteomics** 5: 2336-2349. PMID: 16963780.
14. Tobias JW, Shrader TE, Rocap G, Varshavsky A (1991). The N-end rule in bacteria. **Science** 254: 1374-1377. PMID: 1962196.
15. Shrader TE, Tobias JW, Varshavsky A (1993). The N-end rule in *Escherichia coli*: cloning and analysis of the leucyl, phenylalanyl-tRNA-protein transferase gene *aat*. **J. Bact.** 175: 4364-4374. PMID: 8331068.

16. Graciet E, Hu RG, Piatkov K, Rhee JH, Schwarz EM, Varshavsky A (2006). Aminoacyl-transferases and the N-end rule pathway of prokaryotic/eukaryotic specificity in a human pathogen. **Proc. Natl. Acad. Sci. USA** 103: 3078-3083. PMID: 16492767.
17. Erbse A, Schmidt R, Bornemann T, Schneider-Mergener J, Mogk A, Zahn R, Dougan DA, Bukau B (2006). ClpS is an essential component of the N-end rule pathway in *Escherichia coli*. **Nature** 439: 753-756. PMID: 16467841.
18. Suto K, Shimizu Y, Watanabe K, Ueda T, Fukai S, Nureki O, Tomita K (2006). Crystal structures of leucyl/phenylalanyl-tRNA-protein transferase and its complex with an aminoacyl-tRNA analog. **EMBO J.** 25: 5942-5950. PMID: 17110926.
19. Dong XK-M, M., Muramatsu T, Mori H, Shirouzu M, Bessho Y, Yokoyama S (2007). The crystal structure of leucyl/phenylalanyl-tRNA-protein transferase from *Escherichia coli* **Prot. Sci.** 16: 528-534. PMID: 17242373.
20. Wang KH, Roman-Hernandez G, Grant RA, Sauer RT, Baker TA (2008). The molecular basis of N-end rule recognition. **Mol. Cell** 32: 406-414. doi: 10.1016/j.molcel.2008.08.032.
21. Wang KH, Oakes ESC, Sauer RT, Baker TA (2008). Tuning the strength of a bacterial N-end rule signal. **J. Biol. Chem.** 283: 24600-24607. doi: 10.1074/jbc.M802213200.
22. Hou JY, Sauer RT, Baker TA (2008). Distinct structural elements of the adaptor ClpS are required for regulating degradation by ClpAP. **Nat. Struct. Mol. Biol.** 15: 288-294. doi: 10.1038/nsmb.1392.
23. Schmidt R, Zahn R, Bukau B, Mogk A (2009). ClpS is the recognition component for *Escherichia coli* substrates of the N-end rule degradation pathway. **Mol. Microbiol.** 72: 506-517. doi: 10.1111/j.1365-2958.2009.06666.x.
24. Román-Hernández G, Grant RA, Sauer RT, Baker TA (2009). Molecular basis of substrate selection by the N-end rule adaptor protein ClpS. **Proc. Natl. Acad. Sci. USA** 106: 8888-8893. doi: 10.1073/pnas.0903614106.
25. Schuenemann VJ, Kralik SM, Albrecht R, Spall SK, Truscott KN, Dougan DA, Zeth K (2009). Structural basis of N-end rule substrate recognition in *Escherichia coli* by the ClpAP adaptor protein ClpS. **EMBO Rep.** 10: 508-514. doi: 10.1038/embor.2009.62.
26. Ninnis RL, Spall SK, Talbo GH, Truscott KN, Dougan DA (2009). Modification of PATase by L/F-transferase generates a ClpS-dependent N-end rule substrate in *Escherichia coli*. **EMBO J.** 28: 1732-1744. doi: 10.1038/emboj.2009.134.
27. Román-Hernández G, Hou JY, Grant RA, Sauer RT, Baker TA (2011). The ClpS adaptor mediates staged delivery of N-end rule substrates to the AAA+ ClpAP protease. **Mol. Cell** 43: 217-228. doi: 10.1016/j.molcel.2011.06.009.
28. Humbard MA, Surkov S, De Donatis GM, Jenkins L, Maurizi MR (2013). The N-degradome of *Escherichia coli*: limited proteolysis in vivo generates a large pool of proteins bearing N-degrons. **J. Biol. Chem.** 288: 28913-28924. doi: 10.1074/jbc.M113.492108.
29. Rivera-Rivera I, Román-Hernández G, Sauer RT, Baker TA (2014). Remodeling of a delivery complex allows ClpS-mediated degradation of N-degron substrates. **Proc. Natl. Acad. Sci. USA** 111: E3853-E3859. doi: 10.1073/pnas.1414933111.
30. Fung AW, Fahlman RP (2015). The molecular basis for the post-translational addition of amino acids by L/F-transferase in the N-end rule pathway. **Curr. Prot. Pept. Sci.** 16: 163-180. PMID: 25579118.



31. Dougan DA, Micevski D, Truscott KN (2011). The N-end rule pathway: from recognition by N-recognins to destruction by AAA+ proteases. **Biochim. Biophys. Acta** 1823: 83-91. doi: 10.1016/j.bbamcr.2011.07.002.
32. Mogk A, Schmidt R, Bukau B (2007). The N-end rule pathway of regulated proteolysis: prokaryotic and eukaryotic strategies. **Trends Cell Biol.** 17: 165-172. PMID: 17306546.
33. Blattner FR, Plunkett G, 3rd, Bloch CA, Perna NT, Burland V, Riley M, Collado-Vides J, Glasner JD, Rode CK, Mayhew GF, Gregor J, Davis NW, Kirkpatrick HA, Goeden MA, Rose DJ, Mau B, Shao Y (1997). The complete genome sequence of *Escherichia coli* K-12. **Science** 277: 1453-1462. PMID: 9278503.
34. Singer M, Baker TA, Schnitzler G, Deischel SM, Goel M, Dove W, Jaacks KJ, Grossman AD, Erickson JW, Gross CA (1989). A collection of strains containing genetically linked alternating antibiotic resistance elements for genetic mapping of *Escherichia coli*. **Microbiol. Rev.** 53: 1-24. PMID: 2540407.
35. Chang AC, Cohen SN (1978). Construction and characterization of amplifiable multicopy DNA cloning vehicles derived from the P15A cryptic miniplasmid. **J. Bacteriol.** 134: 1141-1156. PMID: 149110.
36. Rose RE (1988). The nucleotide sequence of pACYC184. **Nucl. Acids Res.** 16: 355.
37. Datsenko KA, Wanner BL (2000). One-step inactivation of chromosomal genes in *Escherichia coli* K-12 using PCR products. **Proc. Natl. Acad. Sci. USA** 97: 6640-6645. PMID: 10829079.
